# Supplementary material for: Impact of introducing electric vehicles on ground-level O 3 and PM 2.5 in the Greater Tokyo Area: yearly trends and the importance of changes in the urban heat island effect
Source: Copernicus journal article supplement (doi:10.5194/acp-25-1037-2025), 2025-01-27
Supplement: Supplementary file 1 [file acp-25-1037-2025-supplement.pdf]

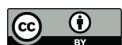

*Supplement of*

**Impact of introducing electric vehicles on ground-level O<sub>3</sub> and PM<sub>2.5</sub> in the Greater Tokyo Area: yearly trends and the importance of changes in the urban heat island effect**

**Hiroo Hata et al.**

*Correspondence to:* Hiroo Hata ([hata-hiroo@aist.go.jp](mailto:hata-hiroo@aist.go.jp))

The copyright of individual parts of the supplement might differ from the article licence.

### Text S1 *Additional information on numerical simulations*

Table S1: Latitude and longitude of the seven sites analyzed in model validation within this study.

| Prefecture | City       | Longitude | Latitude |
|------------|------------|-----------|----------|
| Tokyo      | Tokyo      | 139.75    | 35.69    |
| Kanagawa   | Yokohama   | 139.65    | 35.44    |
| Chiba      | Chiba      | 140.10    | 35.60    |
| Saitama    | Saitama    | 139.59    | 35.88    |
| Tochigi    | Utsunomiya | 139.88    | 36.56    |
| Gunma      | Maebashi   | 139.07    | 36.38    |
| Ibaraki    | Mito       | 140.47    | 36.37    |

Table S2: Calculation settings for the WRF.

| Model                             | WRF-ARW v4.3.3                                                         |
|-----------------------------------|------------------------------------------------------------------------|
| Reanalysis                        | NCEP FNL (1 deg., 6 hr)                                                |
| SST                               | NOAA SST (0.082 deg., 6 hr)                                            |
| domains                           | 220×170, 45 km (D1), 154×160 (D2), 64×70 (D3)                          |
| Minimum vertical pressure (p_top) | 100 hPa                                                                |
| Grid nudging                      | k_zfac_uv = 10<br>guv, gt, gq = 0.0001 (D1), 0.00005 (D2), 0.0000 (D3) |
| Microphysics                      | WRF Single-Moment 5-class scheme                                       |
| Longwave radiation                | RRTMG scheme                                                           |
| Shortwave radiation               | RRTMG scheme                                                           |
| Planetary boundary layer          | Mellor-Yamada Nakanishi and Niino Level 3 PBL scheme                   |
| Cloud Physics                     | Kain-Fritsch scheme                                                    |
| Urban physics                     | Urban-canopy model (UCM)                                               |

Table S3: Calculation settings for the CMAQ.

| Model                         | CMAQv5.3.3                    |
|-------------------------------|-------------------------------|
| Boundary concentration (D1)   | MOZART-4/GEOS5                |
| Boundary concentration (D2)   | Nested from D1                |
| Boundary concentration (D3)   | Nested from D2                |
| Initial concentration (D1)    | CMAQ default (profile)        |
| Initial concentration (D2)    | Nested from D1                |
| Initial concentration (D3)    | Nested from D2                |
| Gas/Aerosol/Aqueous chemistry | saprc07tc/aero6/cloud_acm_ae6 |
| Photolysis                    | phot_inline                   |

|                      |                  |
|----------------------|------------------|
| Horizontal advection | Yamo             |
| Vertical advection   | wrf              |
| Horizontal diffusion | hdiff/multiscale |
| Vertical diffusion   | vdiff/acm        |
| Dry deposition       | m3dry            |

---

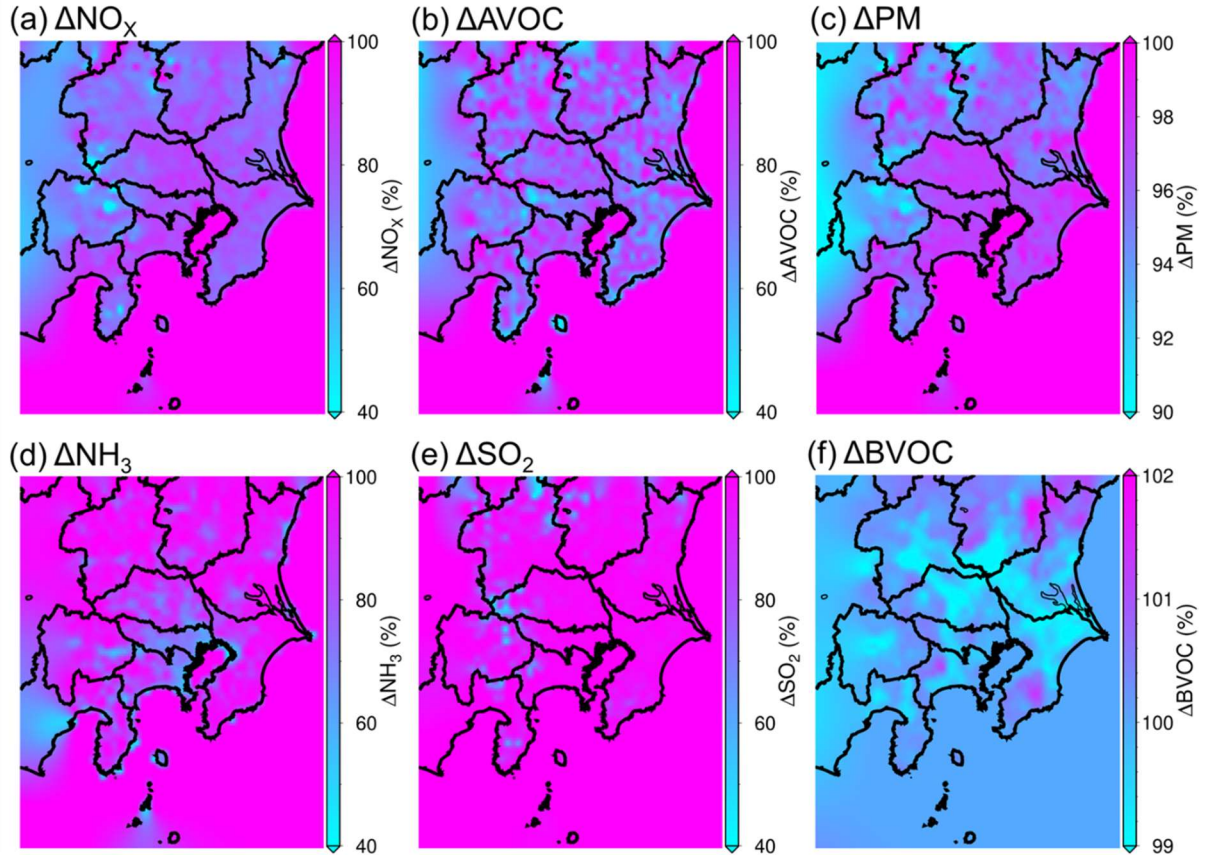

Fig. S1: Changes in annual emissions in ALL and BASE scenarios (ALL/BASE) in terms of: (a) NO<sub>x</sub>, (b) anthropogenic VOCs (AVOC), (c) particulate matter (PM), (d) NH<sub>3</sub>, (e) SO<sub>2</sub>, and (f) biogenic VOCs (BVOC). The following would occur through introducing EVs and are included: a reduction in tailpipe exhaust and evaporative emissions, an increase in emissions from power plants owing to battery charging, and changes in BVOC emissions caused by a change in the UHI effect.

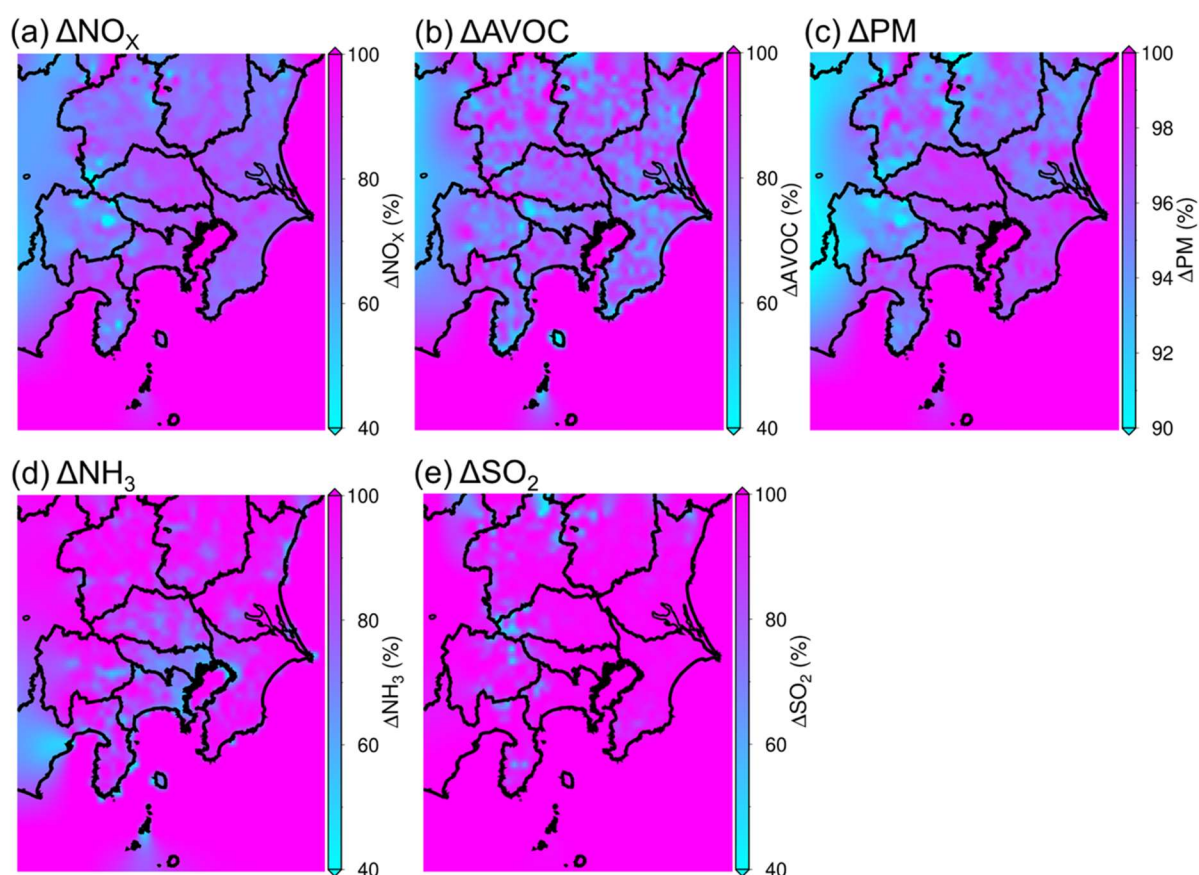

Fig. S2: Changes in annual emissions produced in  $S_{EV}$  and BASE scenarios ( $S_{EV}/BASE$ ): (a)  $NO_x$ , (b) anthropogenic VOC (AVOC), (c) particulate matter (PM), (d)  $NH_3$ , and (e)  $SO_2$ .

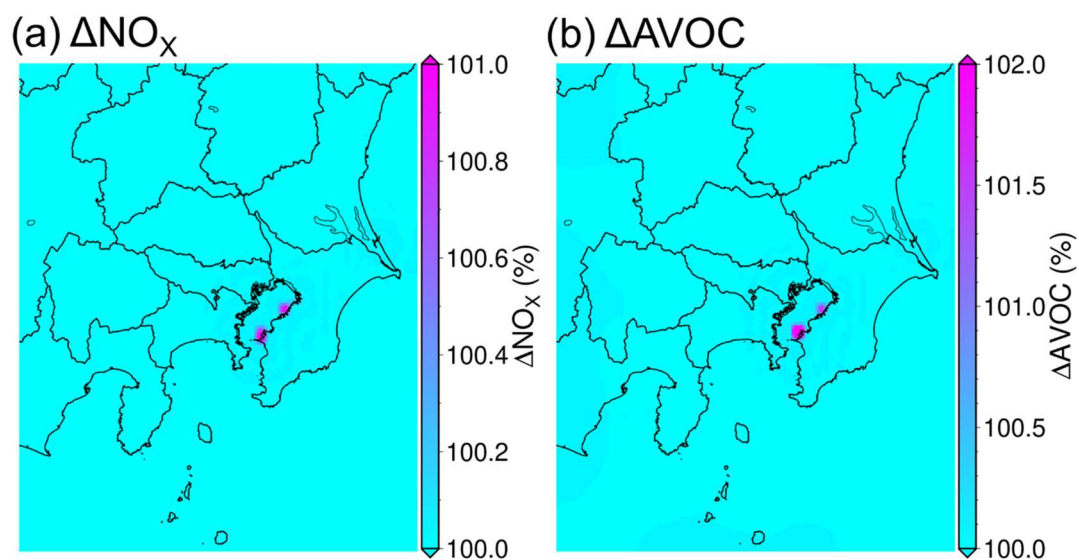

Fig. S3: Changes in annual emissions produced in  $S_{PP}$  and BASE scenarios ( $S_{PP}/BASE$ ): (a)  $NO_x$  and (b) anthropogenic VOCs (AVOC). Significant changes in  $NO_x$  and AVOC emissions are observed.

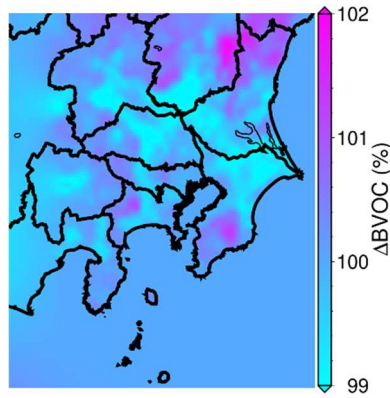

Fig. S4: Changes in annual BVOC emissions produced in  $S_{BVOC}$  and BASE scenarios ( $S_{BVOC}/BASE$ ). BVOCs are defined as the sum of isoprene, monoterpenes, and sesquiterpenes. The change in BVOC emissions from the BASE scenario is caused by a change in the UHI effect owing to the introduction of BEVs.

### Text S3 *Additional information to supplement results section*

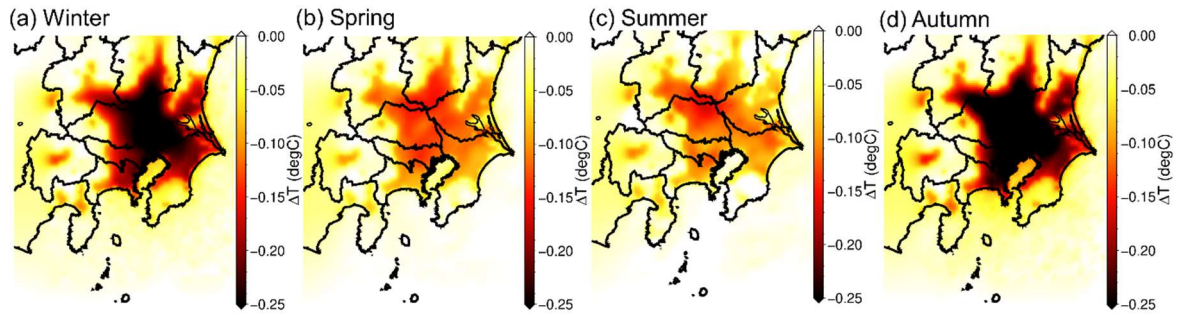

Fig. S5: Changes in ground temperature resulting from a decrease in the UHI effect owing to the introducing BEVs in the GTA.

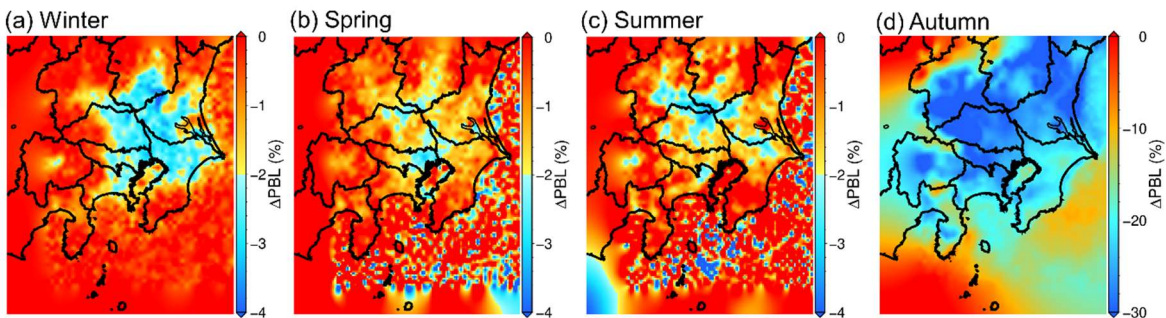

Fig. S6: Changes in the planetary boundary layer (PBL: %) from the ground surface to the free troposphere resulting from a decrease in the UHI effect owing to introducing BEVs in the GTA.

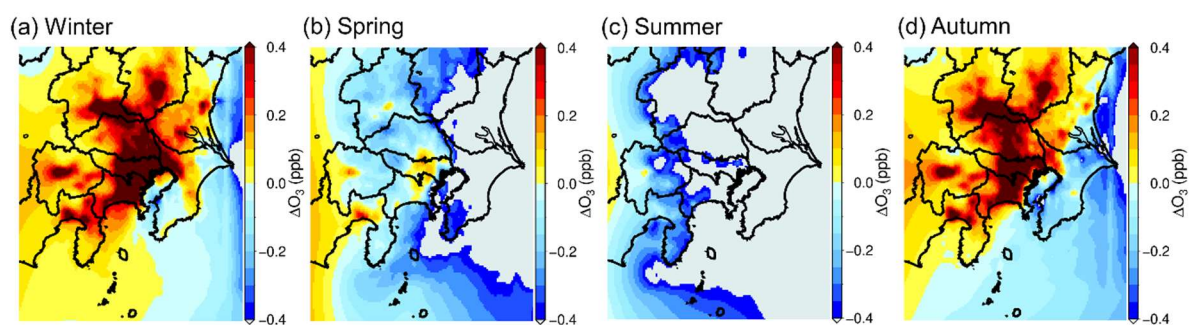

Fig. S7: Changes in  $O_3$  concentration in four seasons following the introduction of BEVs in the GTA.

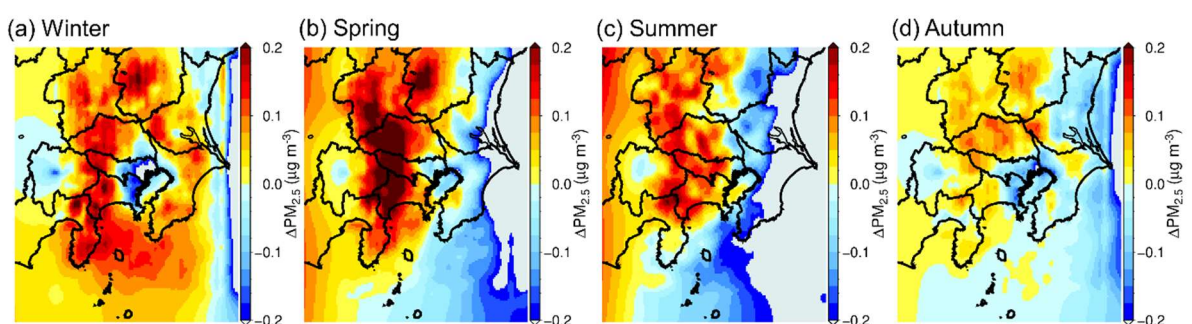

Fig. S8: Changes in  $PM_{2.5}$  concentration in four seasons following the introduction of BEVs in the GTA.

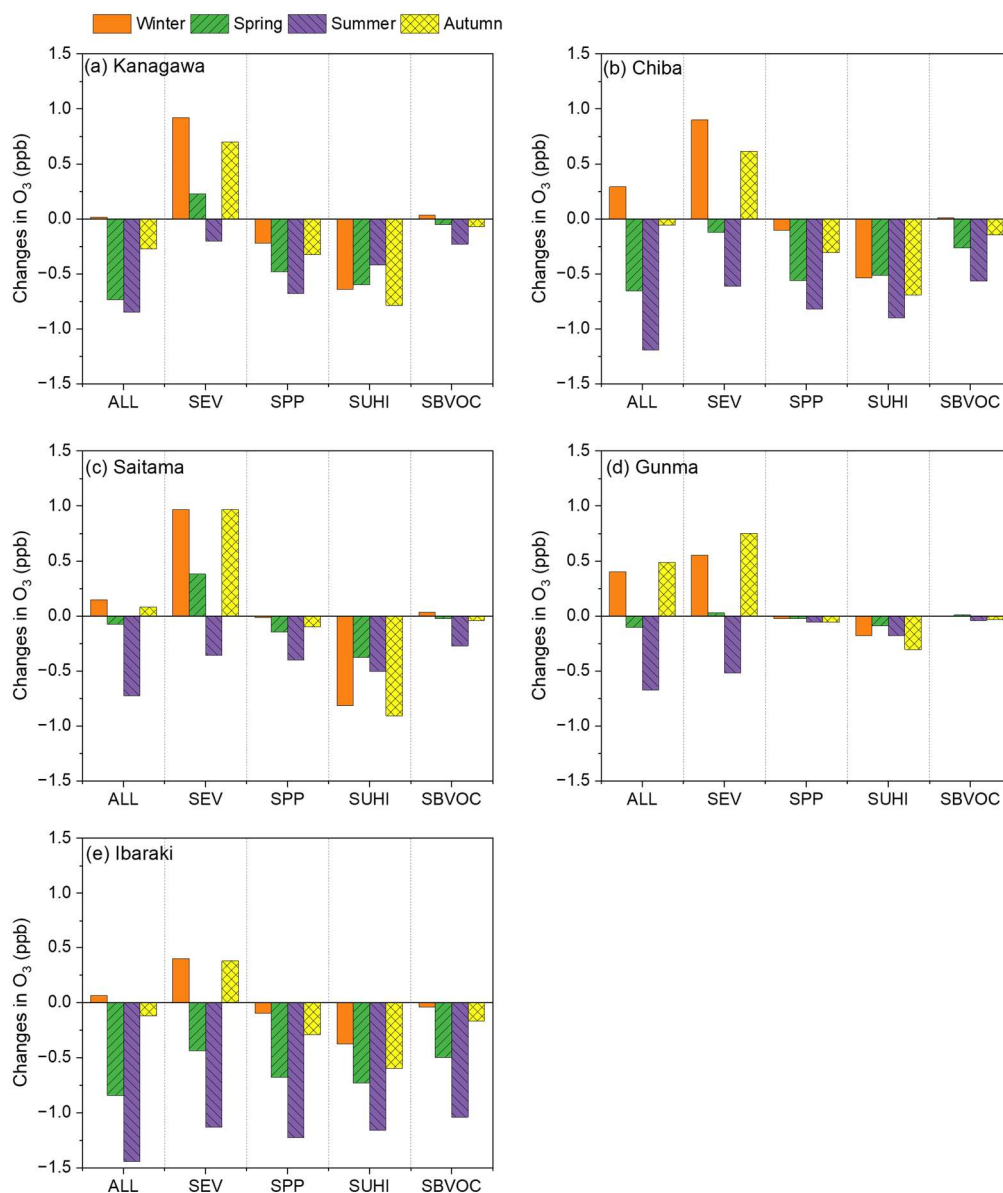

Fig. S9: Contributions of the five scenarios listed in Table 1 (of the main article) to the changes in O<sub>3</sub> in (a) Kanagawa, (b) Chiba, (c) Saitama, (d) Gunma, and (e) Ibaraki.

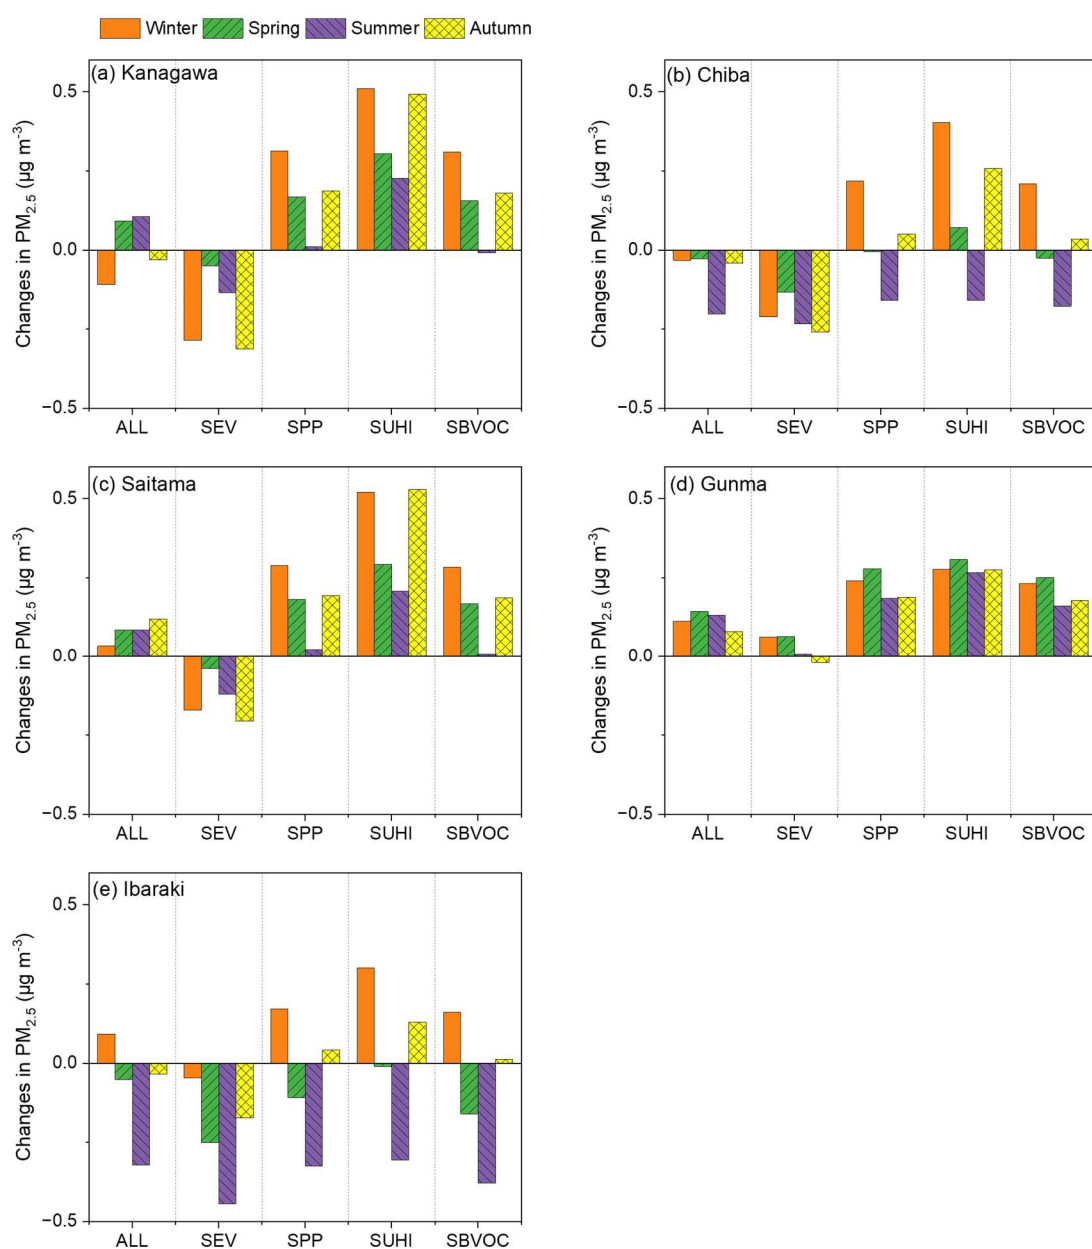

Fig. S10: Contributions of the five scenarios listed in Table 1 (of the main article) to the changes in  $PM_{2.5}$  in (a) Kanagawa, (b) Chiba, (c) Saitama, (d) Gunma, and (e) Ibaraki.

Table S4: Concentrations of the species defined in the box modeling of SAPRC-07. Definitions of the species are listed in the previous work (Carter. Atmos. Environ. 44(40), 5324-5335, 2010.)

| Species | Conc. (ppm) | Species | Conc. (ppm) | Species | Conc. (ppm) |
|---------|-------------|---------|-------------|---------|-------------|
| CO      | 1.00E+00    | B124    | 1.49E-03    | MEK     | 2.95E-03    |
| NO      | 3.47E-01    | BENZ    | 3.54E-03    | MGLY    | 3.59E-05    |
| NO2     | 3.56E-02    | CRES    | 4.78E-04    | MVK     | 0.00E+00    |
| SO2     | 3.66E-01    | MXYL    | 4.18E-03    | RCHO    | 7.15E-04    |
| NH3     | 1.90E-01    | NAPH    | 2.04E-04    | AACD    | 6.71E-04    |
| ALK1    | 8.93E-03    | OXYL    | 2.41E-03    | BACL    | 5.11E-04    |
| ALK2    | 1.63E-02    | PXYL    | 1.83E-03    | ETOH    | 1.57E-02    |
| ALK3    | 2.76E-02    | TOLU    | 1.18E-02    | FACD    | 3.77E-05    |
| ALK4    | 3.75E-02    | 13BDE   | 3.53E-04    | MEOH    | 5.25E-03    |
| ALK5    | 1.17E-02    | ACET    | 4.05E-03    | PACD    | 1.85E-04    |
| OLE1    | 2.66E-03    | ACRO    | 1.15E-04    | IPRD    | 5.70E-03    |
| OLE2    | 6.76E-03    | BALD    | 6.79E-05    | PRD2    | 1.13E-03    |
| ETHE    | 1.12E-02    | CCHO    | 1.75E-03    | ACYE    | 1.32E-03    |
| ARO1    | 6.61E-03    | GLY     | 5.68E-05    | ISOP    | 3.06E-02    |
| ARO2    | 4.73E-03    | HCHO    | 1.39E-02    | APIN    | 7.97E-06    |
| ARO2MN  | 4.53E-03    | MACR    | 4.71E-05    | TERP    | 5.11E-03    |
